# Supplementary material for: Infestation of an endemic arbovirus area by sympatric populations of Aedes aegypti and Aedes albopictus in Brazil
Source: PubMed Central journal article supplement (PMC7233267; doi:10.1590/0074-02760190437), 2020-05-18
Supplement: 1678-8060-mioc-115-e190437-s.pdf [file 1678-8060-mioc-115-e190437-s.pdf]

TABLE I

Total number of *Aedes* eggs collected during twelve months from 2005 (T1) and 2013 (T2) in 59 sentinel ovitraps (s-ovt) set in Sítio dos Pintos area

| Station | T1     | T2   | Station | T1      | T2      |
|---------|--------|------|---------|---------|---------|
| 1       | 1868   | 178  | 31      | 5304    | 2258    |
| 2       | 9837   | 1093 | 32      | 6724    | 2946    |
| 3       | 3468   | 437  | 33      | 2152    | 1017    |
| 4       | 3188   | 522  | 34      | 3479    | 1738    |
| 5       | 6135   | 1148 | 35      | 5078    | 2569    |
| 6       | 20,164 | 3847 | 36      | 2539    | 1286    |
| 7       | 5547   | 1066 | 37      | 4875    | 3068    |
| 8       | 4224   | 979  | 38      | 5255    | 3657    |
| 9       | 7227   | 1688 | 39      | 7854    | 5538    |
| 10      | 6248   | 1505 | 40      | 7234    | 5229    |
| 11      | 7390   | 1826 | 41      | 4258    | 3336    |
| 12      | 3295   | 888  | 42      | 1675    | 1326    |
| 13      | 9227   | 2523 | 43      | 4112    | 3344    |
| 14      | 10,297 | 2838 | 44      | 3069    | 2565    |
| 15      | 5875   | 1653 | 45      | 4150    | 3473    |
| 16      | 5881   | 1683 | 46      | 3529    | 3309    |
| 17      | 4318   | 1239 | 47      | 4205    | 4167    |
| 18      | 4497   | 1291 | 48      | 3866    | 4136    |
| 19      | 4798   | 1421 | 49      | 4226    | 4810    |
| 20      | 7537   | 2537 | 50      | 3386    | 3964    |
| 21      | 2814   | 963  | 51      | 3300    | 4365    |
| 22      | 6641   | 2330 | 52      | 3424    | 5572    |
| 23      | 6081   | 2139 | 53      | 1254    | 2046    |
| 24      | 2135   | 772  | 54      | 2856    | 4707    |
| 25      | 11,060 | 4136 | 55      | 887     | 1652    |
| 26      | 8026   | 3010 | 56      | 2220    | 4272    |
| 27      | 3792   | 1423 | 57      | 1469    | 3322    |
| 28      | 10,099 | 4024 | 58      | 1132    | 2802    |
| 29      | 6312   | 2535 | 59      | 349     | 4633    |
| 30      | 5291   | 2241 | Total   | 281.103 | 146.153 |

TABLE II

Number of *Aedes aegypti* and *Aedes albopictus* adults identified from eggs collected in sentinel ovitraps (s-ovt) in the Sítio dos Pintos neighbourhood of Recife-PE

| Station | February/2013      |        |                       |        | December/2013      |        |                       |        |
|---------|--------------------|--------|-----------------------|--------|--------------------|--------|-----------------------|--------|
|         | <i>Ae. aegypti</i> |        | <i>Ae. albopictus</i> |        | <i>Ae. aegypti</i> |        | <i>Ae. albopictus</i> |        |
|         | Male               | Female | Male                  | Female | Male               | Female | Male                  | Female |
| 116     | 0                  | 2      | 1                     | 3      | 0                  | 0      | 1                     | 2      |
| 412     | 3                  | 4      | 22                    | 18     | 2                  | 0      | 39                    | 38     |
| 207     | 1                  | 0      | 25                    | 20     | 0                  | 0      | 0                     | 0      |
| 411     | 1                  | 0      | 10                    | 0      | 0                  | 0      | 107                   | 84     |
| 406     | 2                  | 1      | 2                     | 1      | 0                  | 0      | 2                     | 2      |
| 115     | 0                  | 0      | 3                     | 2      | 1                  | 0      | 12                    | 29     |
| 301     | 1                  | 0      | 0                     | 0      | 0                  | 0      | 0                     | 0      |
| 204     | 0                  | 0      | 1                     | 2      | 0                  | 0      | 0                     | 12     |
| 118     | 1                  | 0      | 6                     | 7      | 0                  | 1      | 33                    | 32     |
| 205     | 1                  | 2      | 6                     | 2      | 0                  | 0      | 0                     | 0      |
| 320     | 1                  | 2      | 7                     | 3      | 15                 | 23     | 1                     | 3      |
| 117     | 0                  | 0      | 2                     | 0      | 0                  | 0      | 2                     | 2      |
| 305     | 14                 | 6      | 2                     | 0      | 10                 | 4      | 2                     | 4      |
| 208     | 56                 | 52     | 21                    | 7      | 5                  | 5      | 0                     | 0      |
| 312     | 8                  | 10     | 1                     | 1      | 3                  | 1      | 1                     | 0      |
| 121     | 3                  | 5      | 7                     | 4      | 0                  | 1      | 3                     | 5      |
| 109     | 2                  | 0      | 0                     | 0      | 2                  | 1      | 0                     | 0      |
| 303     | 31                 | 28     | 0                     | 1      | 1                  | 0      | 0                     | 0      |
| 310     | 94                 | 112    | 2                     | 0      | 8                  | 9      | 0                     | 0      |
| 415     | 13                 | 0      | 0                     | 0      | 1                  | 0      | 0                     | 0      |
| 214     | 67                 | 75     | 16                    | 37     | 0                  | 0      | 1                     | 0      |
| 211     | 7                  | 12     | 25                    | 9      | 0                  | 0      | 30                    | 39     |
| 404     | 10                 | 10     | 30                    | 12     | 2                  | 1      | 31                    | 27     |
| 413     | 6                  | 2      | 0                     | 0      | 68                 | 25     | 56                    | 83     |
| 110     | 255                | 244    | 2                     | 1      | 8                  | 9      | 8                     | 1      |
| 418     | 47                 | 3      | 9                     | 0      | 21                 | 19     | 1                     | 3      |
| 317     | 0                  | 4      | 7                     | 6      | 0                  | 0      | 1                     | 0      |
| 220     | 30                 | 21     | 23                    | 11     | 80                 | 91     | 17                    | 14     |
| 420     | 3                  | 0      | 4                     | 0      | 95                 | 87     | 33                    | 18     |
| 315     | 17                 | 10     | 0                     | 2      | 3                  | 4      | 4                     | 4      |
| 123     | 6                  | 20     | 0                     | 5      | 0                  | 4      | 6                     | 5      |
| 122     | 8                  | 2      | 11                    | 1      | 1                  | 1      | 0                     | 0      |
| 125     | 24                 | 29     | 0                     | 0      | 1                  | 2      | 0                     | 0      |
| 225     | 39                 | 30     | 0                     | 0      | 32                 | 15     | 4                     | 0      |
| 323     | 53                 | 44     | 1                     | 1      | 11                 | 3      | 1                     | 0      |
| 421     | 2                  | 5      | 0                     | 1      | 4                  | 3      | 1                     | 4      |
| 224     | 6                  | 10     | 17                    | 2      | 1                  | 5      | 0                     | 0      |
| 321     | 0                  | 0      | 0                     | 0      | 0                  | 0      | 0                     | 0      |
| 401     | 1                  | 0      | 0                     | 0      | 0                  | 2      | 0                     | 0      |
| 424     | 54                 | 46     | 0                     | 0      | 41                 | 27     | 1                     | 0      |
| 325     | 38                 | 96     | 11                    | 14     | 0                  | 0      | 0                     | 0      |
| 422     | 56                 | 44     | 4                     | 0      | 118                | 117    | 6                     | 19     |
| 316     | 35                 | 51     | 2                     | 2      | 28                 | 29     | 2                     | 2      |
| 324     | 15                 | 5      | 0                     | 2      | 1                  | 1      | 0                     | 0      |
| 425     | 27                 | 19     | 1                     | 1      | 15                 | 19     | 0                     | 0      |
| 124     | 16                 | 0      | 11                    | 1      | 14                 | 17     | 0                     | 0      |
| 217     | 168                | 169    | 0                     | 2      | 57                 | 29     | 8                     | 0      |
| 319     | 73                 | 84     | 7                     | 29     | 0                  | 0      | 0                     | 0      |
| Total   | 1536               | 1593   | 395                   | 354    | 696                | 587    | 553                   | 584    |
